# Supplementary material for: Functional Specialization within the EXO70 Gene Family in Arabidopsis
Source: MDPI journal article supplement (doi:10.3390/ijms22147595), 2021-07-15
Supplement: s1 [file s1]

## Functional specialization within the EXO70 gene family in Arabidopsis

Vedrana Marković, Ivan Kulich, Viktor Žárský

### Supplemental Figures

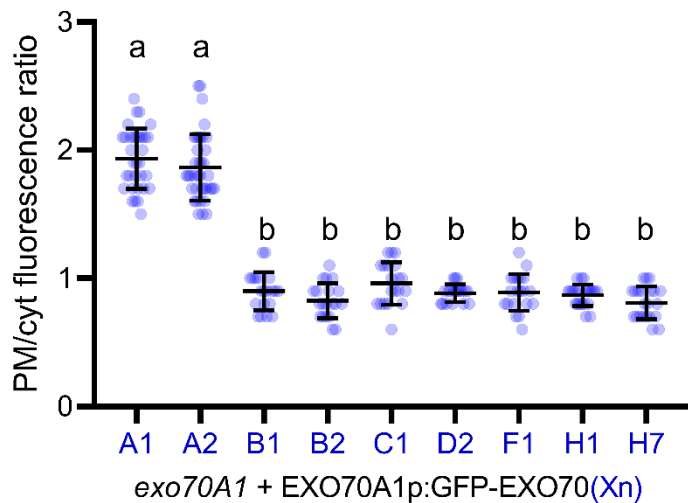

**Supplemental Figure S1.** EXO70A1 and EXO70A2 localize at the PM in *exo70a1* root epidermal cells unlike other EXO70 isoforms; PM association of GFP-tagged EXO70 isoforms expressed under the *EXO70A1* promoter in the *exo70a1* mutant background (related to Figure 3); the PM association was calculated as a ratio between the average GFP fluorescence intensity at the outer lateral PM and in the adjacent cortical cytoplasm; each dataset represents measurements from at least 25 root cells; letters denote statistically different groups calculated by one-way ANOVA with post-hoc Tukey's honest significant difference test;  $P < 0.01$ .

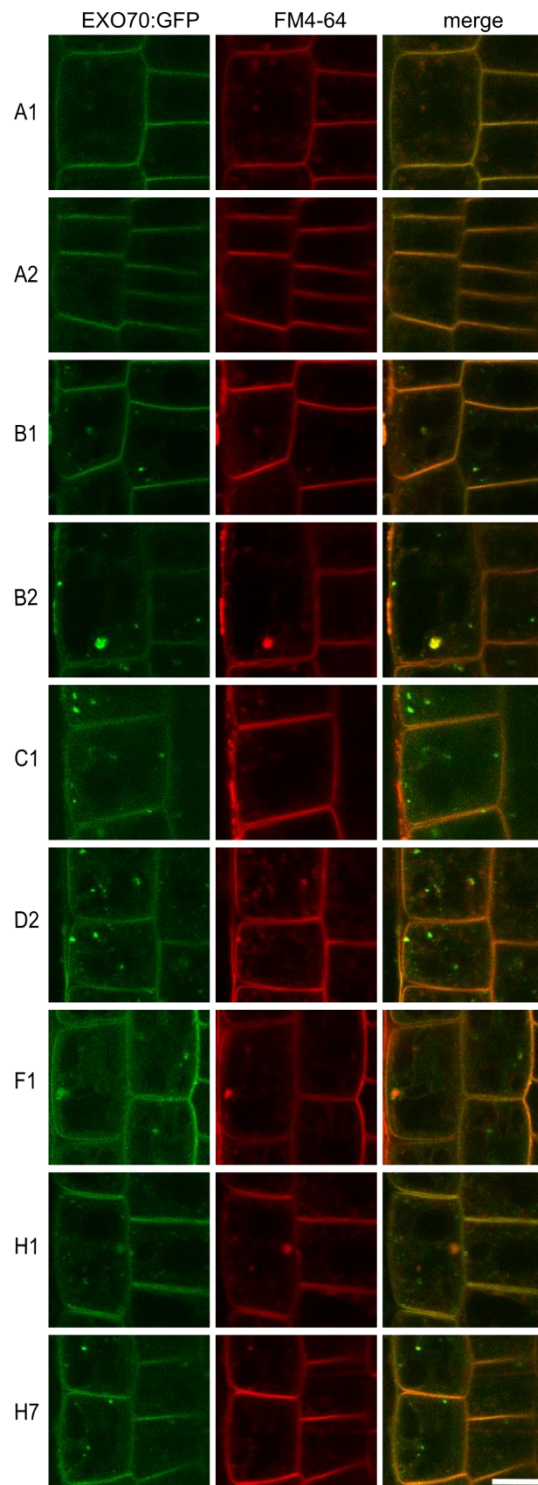

**Supplemental Figure S2.** Aberrant structures containing EXO70 isoforms in root epidermal cells of *exo70a1* are coalesced endomembrane compartments; seedlings of the *exo70a1* mutant expressing different EXO70 isoforms under the EXO70A1 promoter were stained by FM4-64 dye 30 min before imaging; unlike EXO70A1:GFP and EXO70A2:GFP, other EXO70 paralogs accumulated in expanded endomembrane compartments as documented by colocalization with the FM4-64 staining; scale bars = 10  $\mu$ m.

**Supplemental Table S1.** List of primers used in this study.

|                                                                 |                                                    |
|-----------------------------------------------------------------|----------------------------------------------------|
| <i>Plant genotyping</i>                                         |                                                    |
| <i>exo70a1</i> -2 LP                                            | TCCATGGACACAAATTTTCATG                             |
| <i>exo70a1</i> -2 RP                                            | TCTACTGGCATTTTCCCAATGT                             |
| LBb1.3                                                          | ATTTTGCCGATTTTCGGAAC                               |
| <i>exo70b1</i> -2 LP                                            | CGTGGCAGGAGTTAGAAGATG                              |
| <i>exo70b1</i> -2 RP                                            | TTGTCTGCGTTTTTCCCTATG                              |
| Gabi LB 08409                                                   | ATATTGACCATCATACTCATTGC                            |
| <i>Cloning of EXO70A1p::GFP::EXO70 and EXO70B1p::GFP::EXO70</i> |                                                    |
| A1_prom_fw                                                      | ATTGTAAAAAGGGAATGAGCAT                             |
| A1_prom_rev                                                     | AAAATAACGAATAATCTTTCTGAGTTGA                       |
| B1_prom_fw                                                      | TAGAAAAGTTGAATGCGGTAGAAGAGAGG                      |
| B1_prom_rev                                                     | TTTGTACAACTTGGATTGAAACAGATGTGGAACC                 |
| A1_FW                                                           | CTTGTACAAAGTGGCTATGGCTGTTGATAGCAGA                 |
| A1_RV                                                           | GTATAATAAAGTTGTTACCGGCGTGTTTC                      |
| B1_FW                                                           | CTTGTACAAAGTGGCTATGGCGGAGAATGGT                    |
| B1_RV                                                           | GTATAATAAAGTTGTCATTTTCTTCCCGTGGA                   |
| A2_FW                                                           | GGGGACAGCTTTCTTGTACAAAGTGGCTATGGGGGTGGCTC          |
| A2_RV                                                           | GGGGACAACCTTTGTATAATAAAGTTGCTTTATCTCTTTGGCTCACTCC  |
| B2_FW                                                           | CTTGTACAAAGTGGCTATGGCTGAAGCCGG                     |
| B2_RV                                                           | GTATAATAAAGTTGTCAACTTGAGCTTTCCTTGA                 |
| C1_FW                                                           | GGGGACAACCTTTGTATAATAAAGTTGCTTTATCTCTTGCCTGCC      |
| C1_RV                                                           | GGGGACAGCTTTCTTGTACAAAGTGGCTATGGAGAAATCTGGAAATCAC  |
| D2_FW                                                           | CTTGTACAAAGTGGCTATGGCAACACCGGA                     |
| D2_RV                                                           | GTATAATAAAGTTGTCACTGAGACCGTCTC                     |
| F1_FW                                                           | GGGGACAGCTTTCTTGTACAAAGTGGCTATGGCCGCAACAAC         |
| F1_RV                                                           | GGGGACAACCTTTGTATAATAAAGTTGCTTTAATTTTCTTCTCGGG     |
| H1_FW                                                           | GGGGACAACCTTTGTATAATAAAGTTGCTTCAGCCTGAAACACAC      |
| H1_RV                                                           | GGGGACAGCTTTCTTGTACAAAGTGGCTATGGCGAAAATGGCG        |
| H7_FW                                                           | GGGGACAACCTTTGTATAATAAAGTTGCTTCATTCAATGACTACTACGTC |
| H7_RV                                                           | GGGGACAGCTTTCTTGTACAAAGTGGCTATGGGGAAGCATTATTC      |
| attB2r adaptor                                                  | GGGGACAGCTTTCTTGTACAAAGTGG                         |
| attB3 adaptor                                                   | GGGGACAACCTTTGTATAATAAAGTTG                        |
| attB1R adaptor                                                  | GGGGACTGCTTTTTTGTACAACTTG                          |
| attB4 adaptor                                                   | GGGGACAACCTTTGTATAGAAAAGTTGAA                      |
| <i>Sequencing of EXO70A2 constructs in Gateway vectors</i>      |                                                    |
| M13_FW                                                          | GTAAAACGACGGCCAGT                                  |
| M13_RV                                                          | AACAGCTATGACCAT                                    |
| GFP_seq_FW                                                      | CCACAACGTCTATATCATGG                               |
| GFP_seq_RV                                                      | ACGCCGTAGGTCAG                                     |
